# Supplementary material
Source: ML conference proceedings conference paper supplement (https://openreview.net/forum?id=-ApAkox5mp)

SHINE with Adjoint Broyden

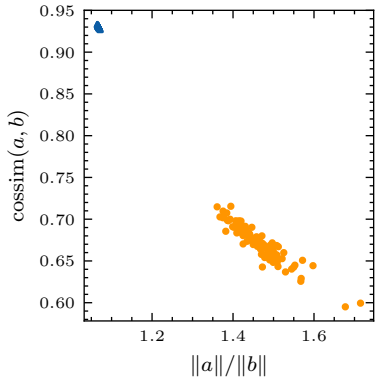

Jacobian-Free method

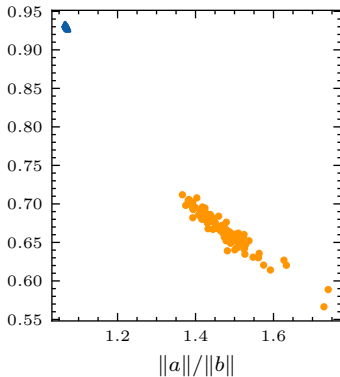**Direction**

- Additional
- ▲ Random

Supplement: supplementary_material [file attachment]

SHINE with Adjoint Broyden

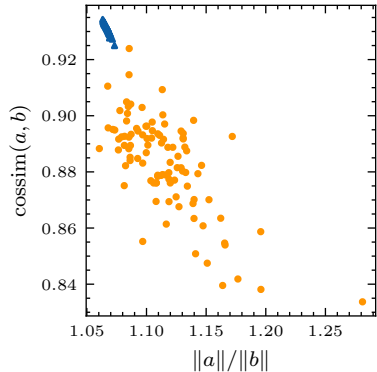

Jacobian-Free method

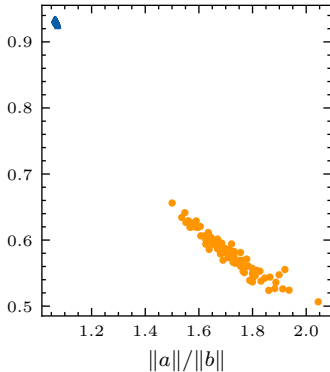**Direction**

● Additional

▲ Random

Supplement: supplementary_material [file attachment]

SHINE with Adjoint Broyden

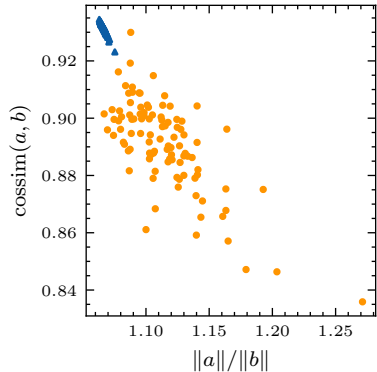

Jacobian-Free method

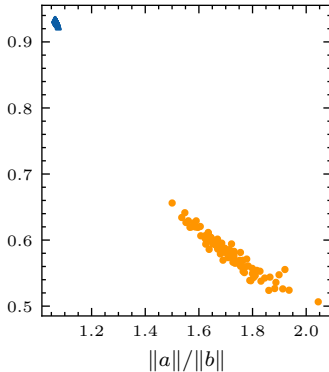**Direction**

● Additional

▲ Random

Supplement: supplementary_material [file attachment]

CIFAR10

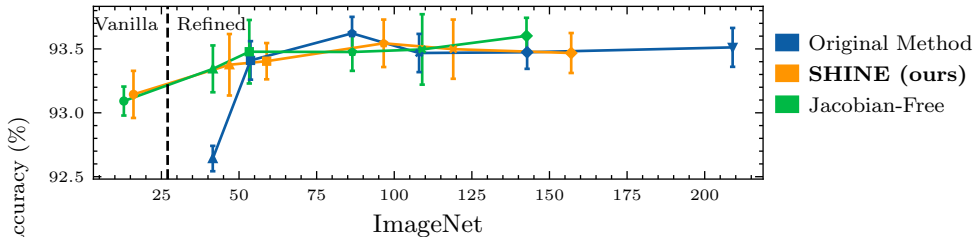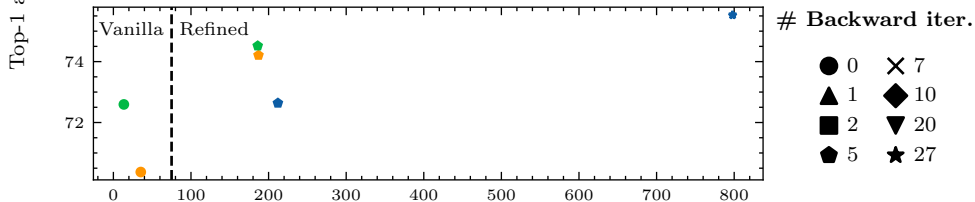

Median backward pass in ms (wall-clock time), on a single V100 GPU, Batch size = 32

Supplement: supplementary_material [file attachment]

20news

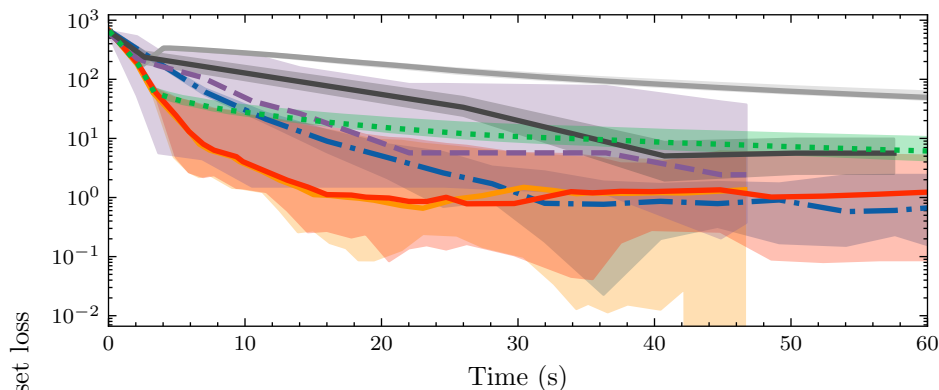

real-sim

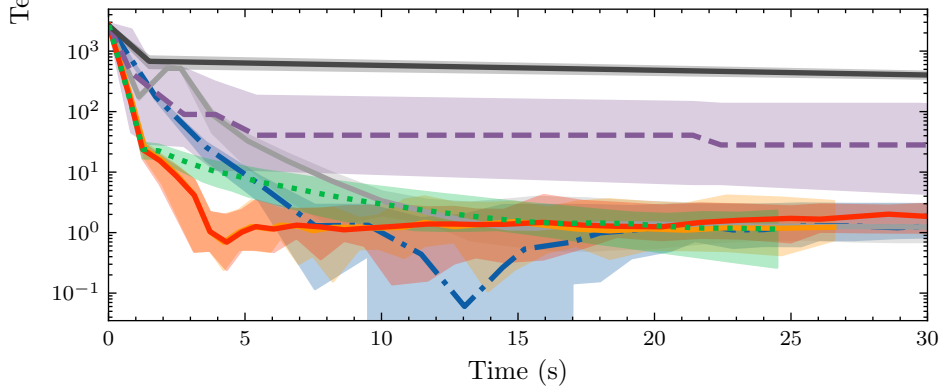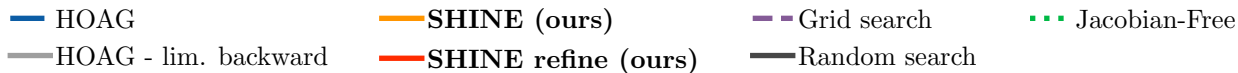

Supplement: supplementary_material [file attachment]

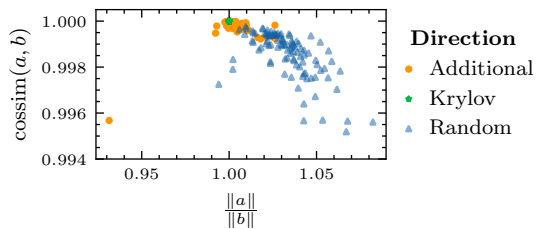

Supplement: supplementary_material [file attachment]

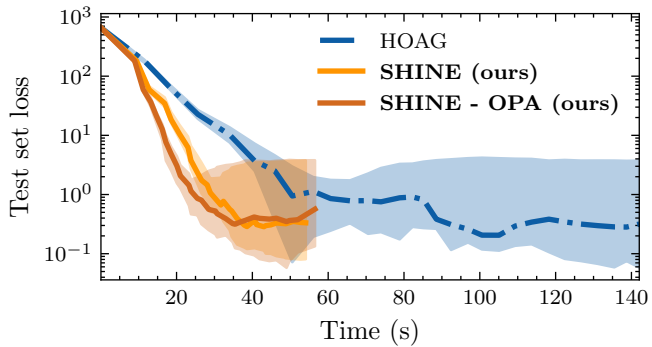

Supplement: supplementary_material [file attachment]

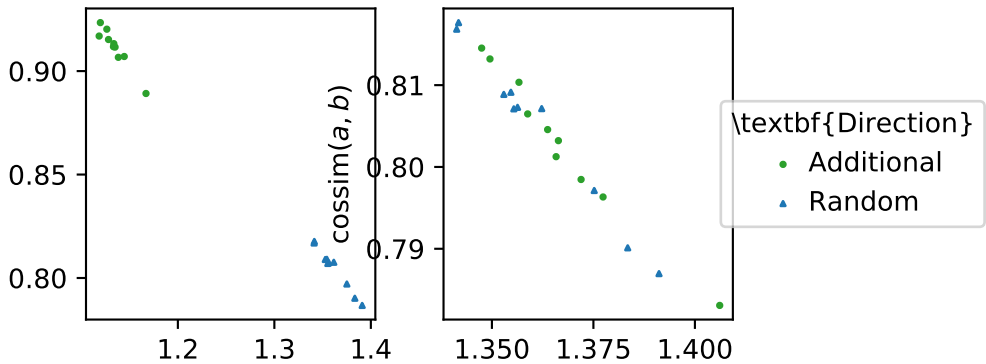

Supplement: supplementary_material [file attachment]

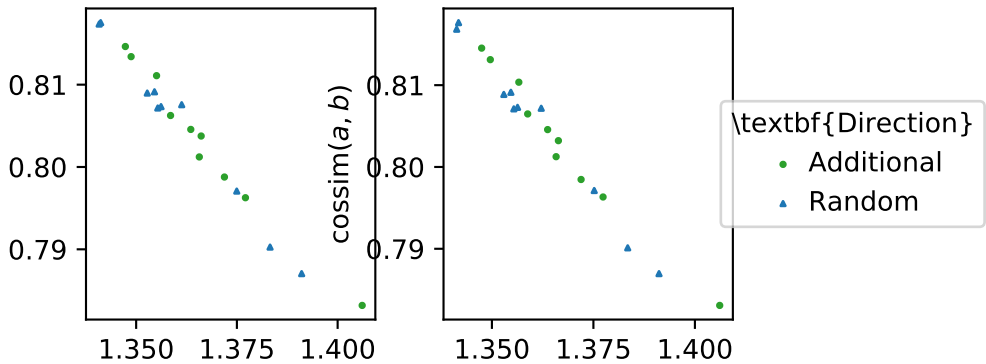

Supplement: supplementary_material [file attachment]

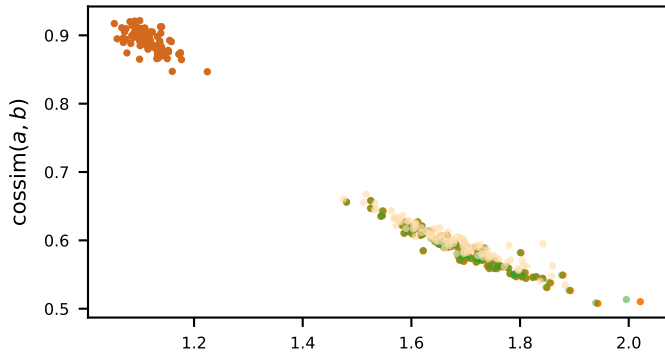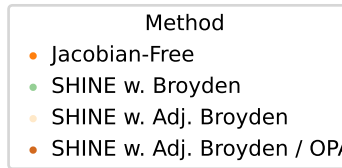

Supplement: supplementary_material [file attachment]

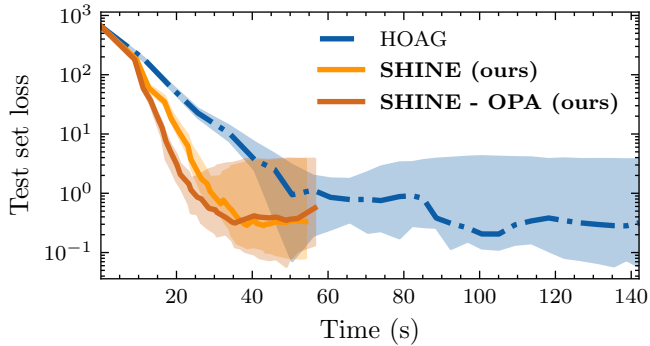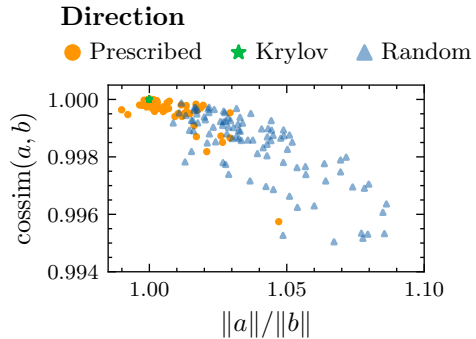

Supplement: supplementary_material [file attachment]

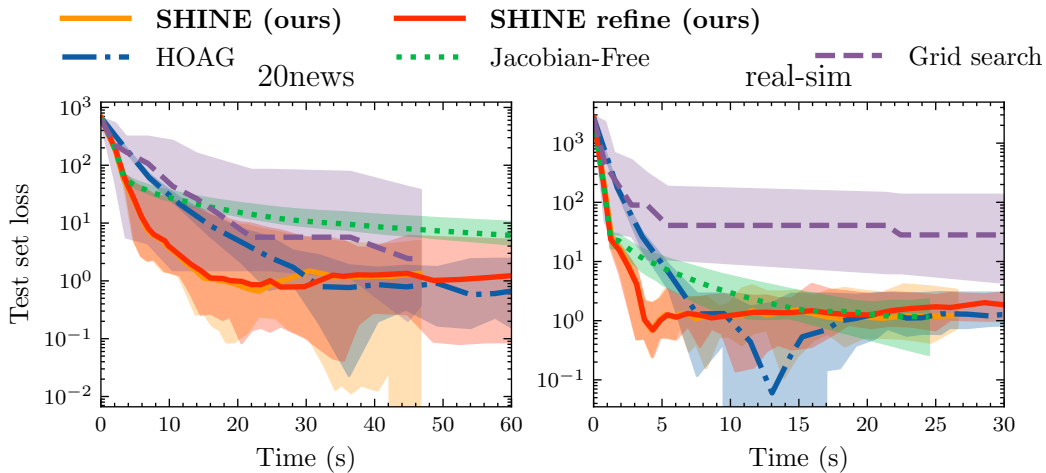

Supplement: supplementary_material [file attachment]

CIFAR10



Median backward pass in ms (wall-clock time), on a single V100 GPU, Batch size = 32

Supplement: supplementary_material [file attachment]
